# Supplementary material for: Inequality in genetic cancer risk suggests bad genes rather than bad luck
Source: PubMed Central journal article supplement (PMC5660094; doi:10.1038/s41467-017-01284-y), 2017-10-27
Supplement: 41467_2017_1284_MOESM2_ESM.pdf [file 41467_2017_1284_MOESM2_ESM.pdf]

## **Description of Additional Supplementary Files**

File Name: Supplementary Data 1

Description: In the Supplementary Data file, we have included the R code for all calculations as a txt file, that is in text format.
